# Supplementary material for: Assessment of performance of the Gail model for predicting breast cancer risk: a systematic review and meta-analysis with trial sequential analysis
Source: Springer Nature journal article supplement (doi:10.1186/s13058-018-0947-5), 2018-03-13
Supplement: 13058_2018_947_MOESM5_ESM.pdf [file 13058_2018_947_MOESM5_ESM.pdf]

# Meta Analysis

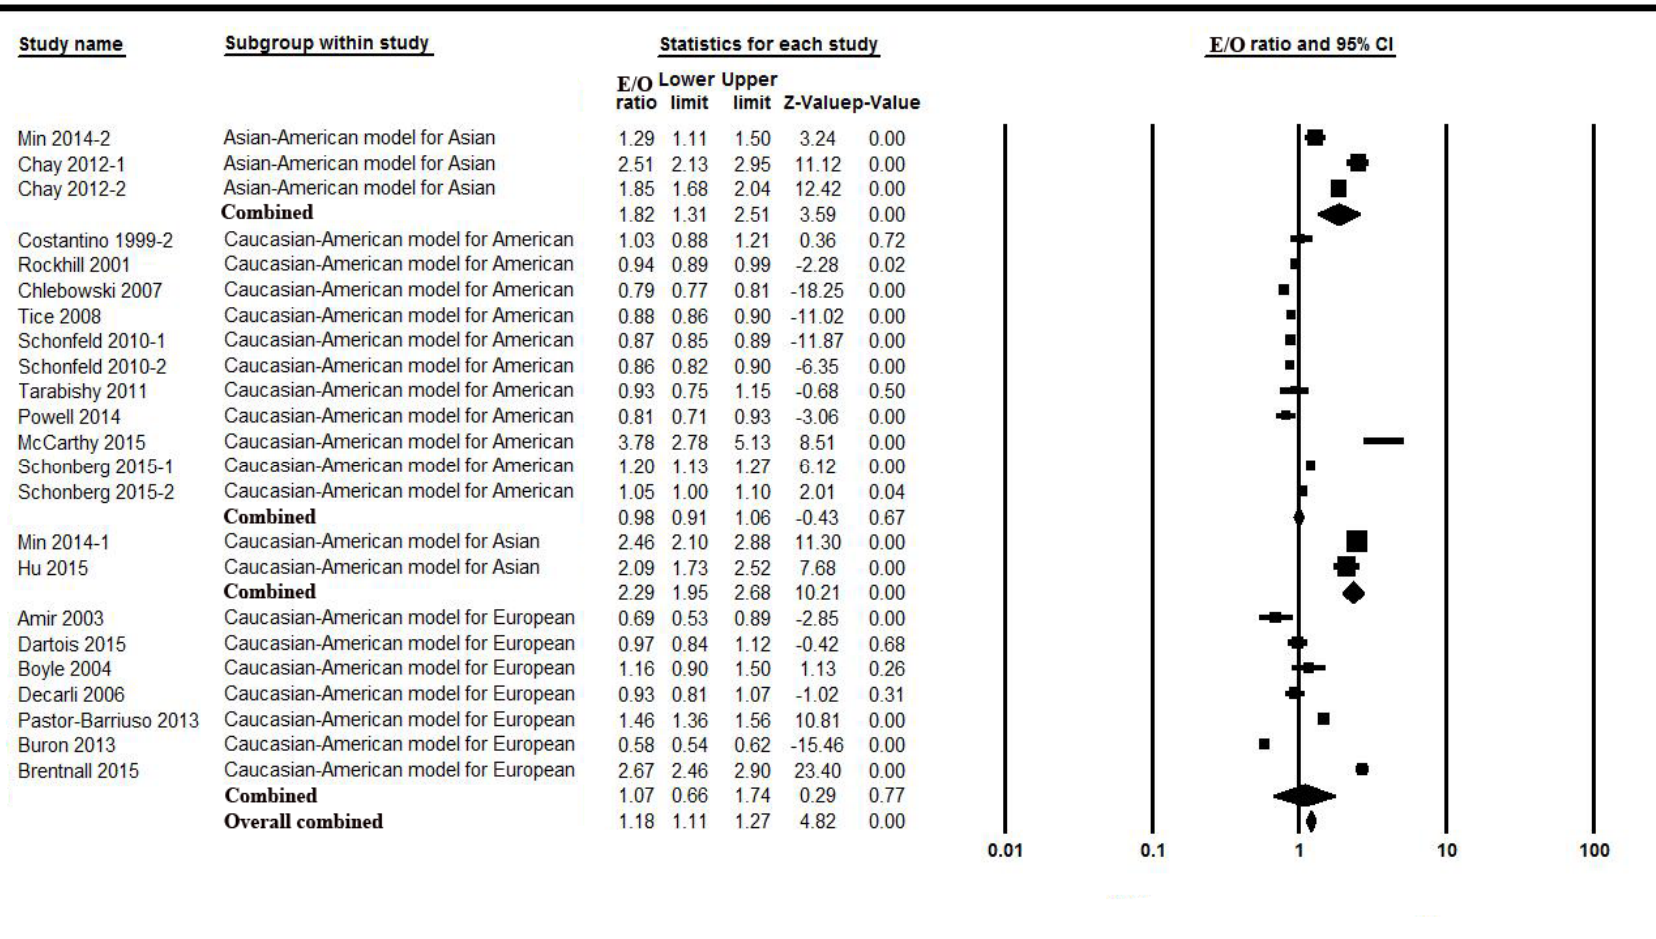

## Meta Analysis

**Additional file 5.** Forest plot of the calibration of the Asian-American version of the Gail model 2 in Asian females and the Caucasian-American Gail model 2 in American, Asian and European women.
