# Supplementary material for: Assessment of performance of the Gail model for predicting breast cancer risk: a systematic review and meta-analysis with trial sequential analysis
Source: Springer Nature journal article supplement (doi:10.1186/s13058-018-0947-5), 2018-03-13
Supplement: 13058_2018_947_MOESM6_ESM.pdf [file 13058_2018_947_MOESM6_ESM.pdf]

A

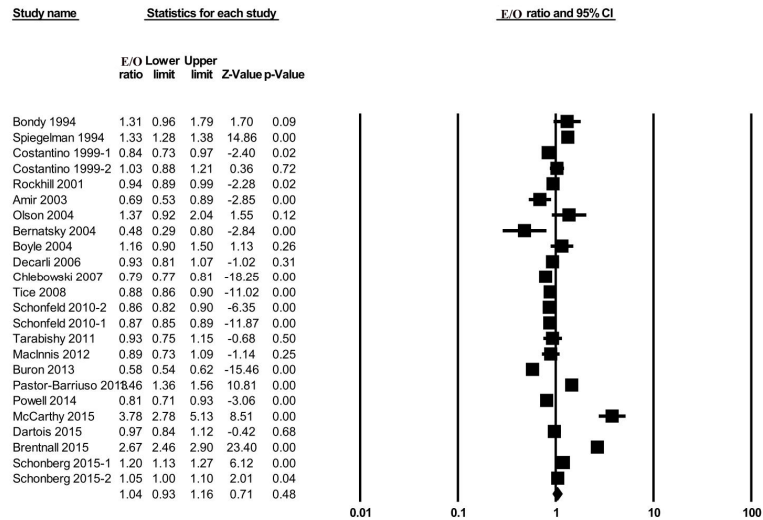

Meta Analysis

C

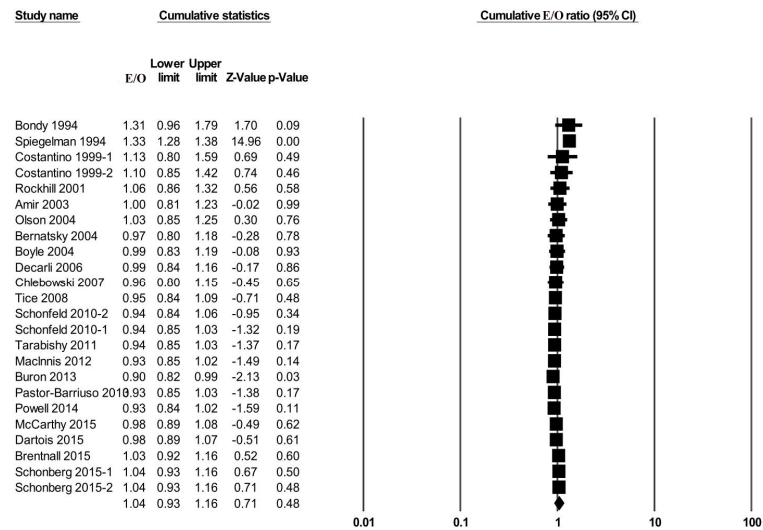

Meta Analysis

B

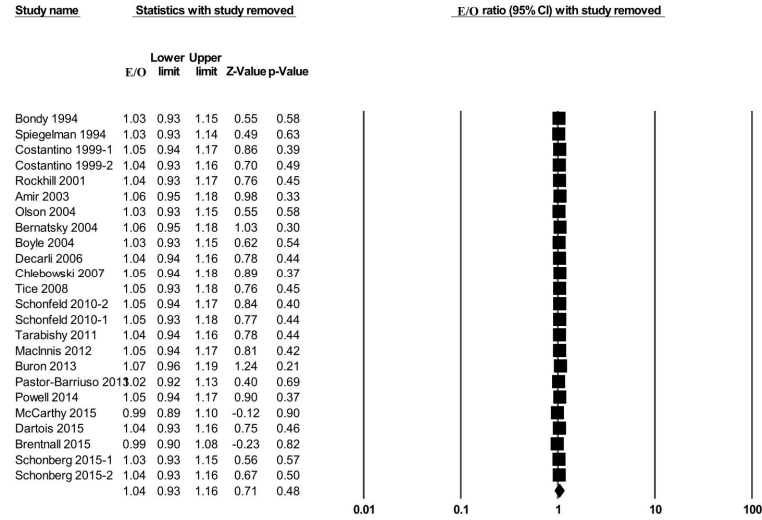

Meta Analysis

D

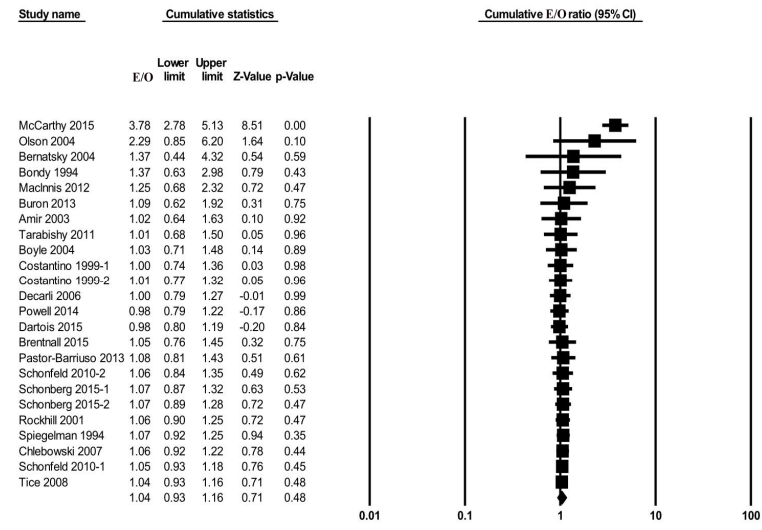

Meta Analysis

**Additional file 6.** Forest plot (A), sensitivity analysis (B) and cumulative analysis ranked by publication year (C) and sample size (D) of the calibration of the Gail model after excluding the studies conducted in Asian women.
