# Supplementary material for: Assessment of performance of the Gail model for predicting breast cancer risk: a systematic review and meta-analysis with trial sequential analysis
Source: Springer Nature journal article supplement (doi:10.1186/s13058-018-0947-5), 2018-03-13
Supplement: 13058_2018_947_MOESM7_ESM.pdf [file 13058_2018_947_MOESM7_ESM.pdf]

# Meta Analysis

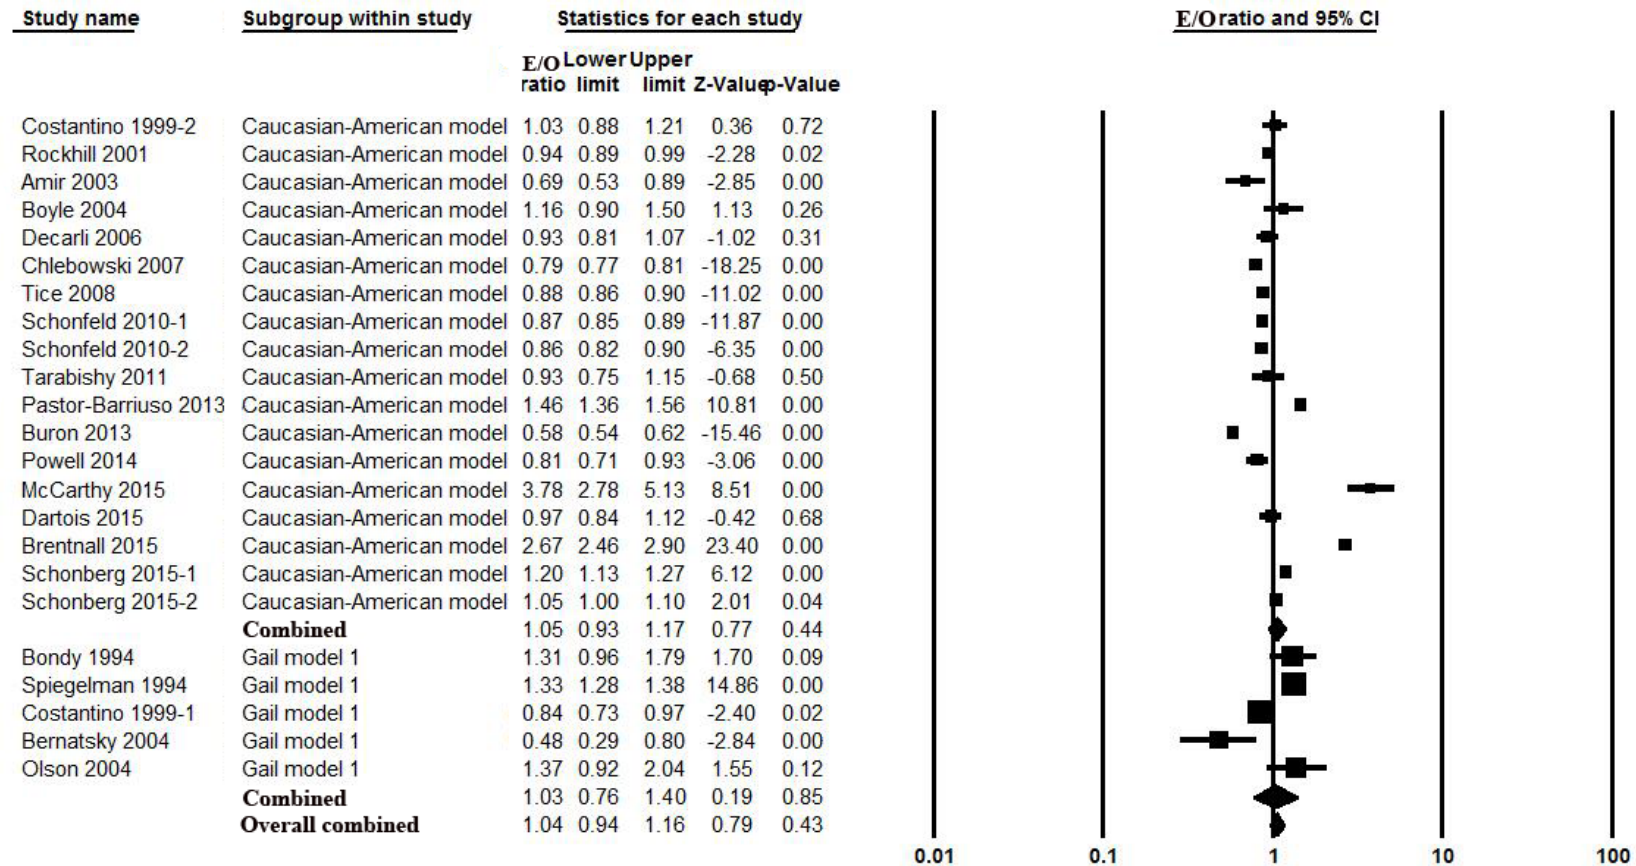

## Meta Analysis

**Additional file 7.** The pooled E/O ratio for the Gail model 1 and Caucasian-American Gail model after excluding the studies conducted in Asian women.
