# Supplementary material for: Assessment of performance of the Gail model for predicting breast cancer risk: a systematic review and meta-analysis with trial sequential analysis
Source: Springer Nature journal article supplement (doi:10.1186/s13058-018-0947-5), 2018-03-13
Supplement: 13058_2018_947_MOESM9_ESM.pdf [file 13058_2018_947_MOESM9_ESM.pdf]

**A**

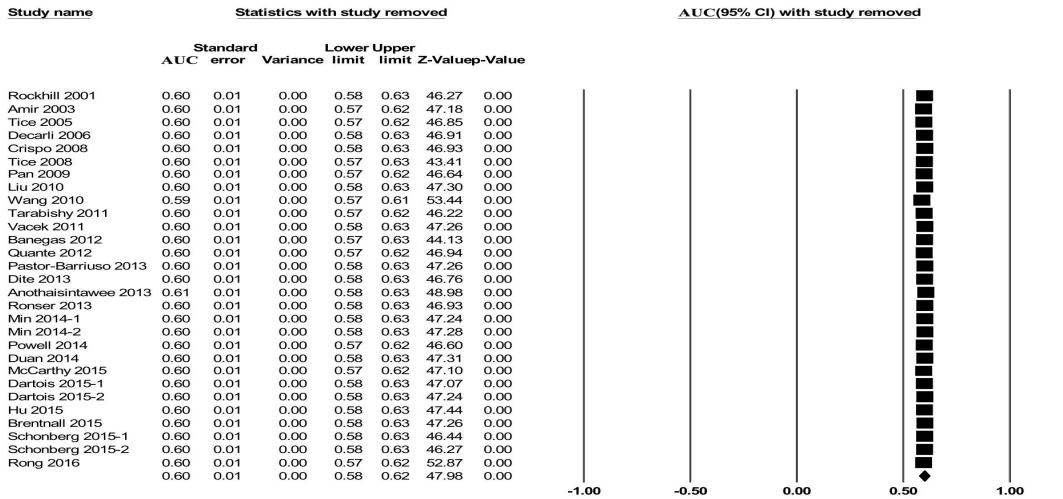

**Meta Analysis**

**B**

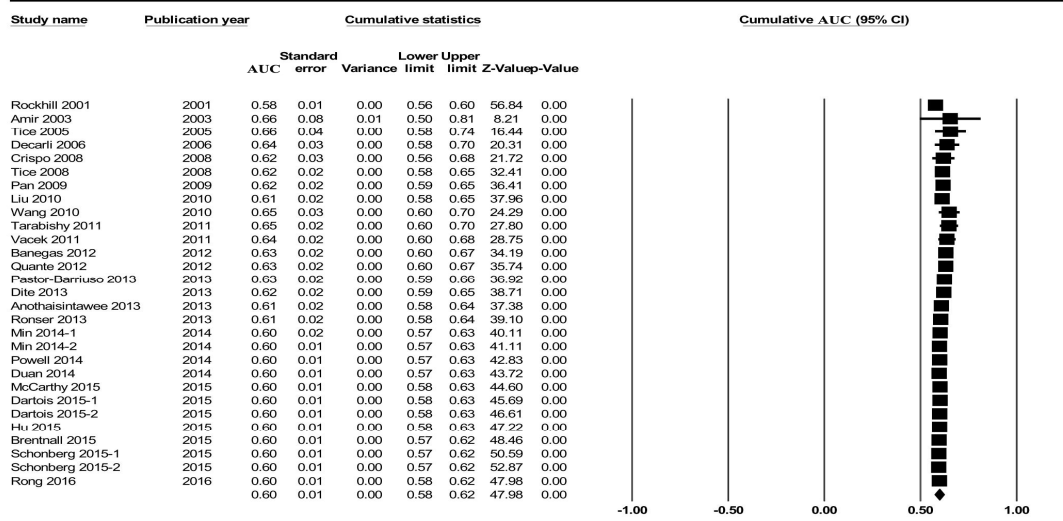

**Meta Analysis**

**C**

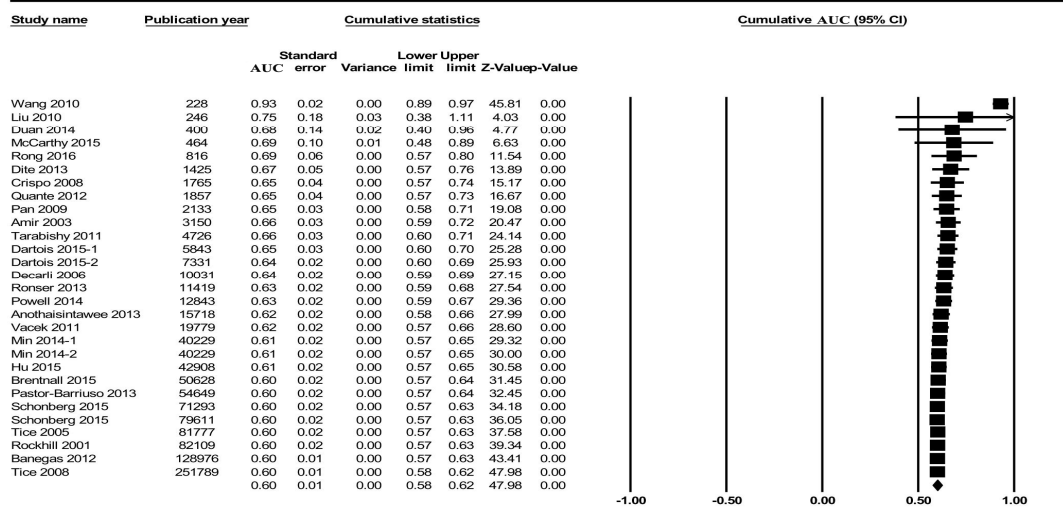

**Meta Analysis**

**Additional file 9.** The sensitivity analysis (A), cumulative meta-analysis ranked by the publication year (B) and sample size (C) of the discrimination of the Gail model.
