# Supplementary material for: Assessment of performance of the Gail model for predicting breast cancer risk: a systematic review and meta-analysis with trial sequential analysis
Source: Springer Nature journal article supplement (doi:10.1186/s13058-018-0947-5), 2018-03-13
Supplement: 13058_2018_947_MOESM12_ESM.pdf [file 13058_2018_947_MOESM12_ESM.pdf]

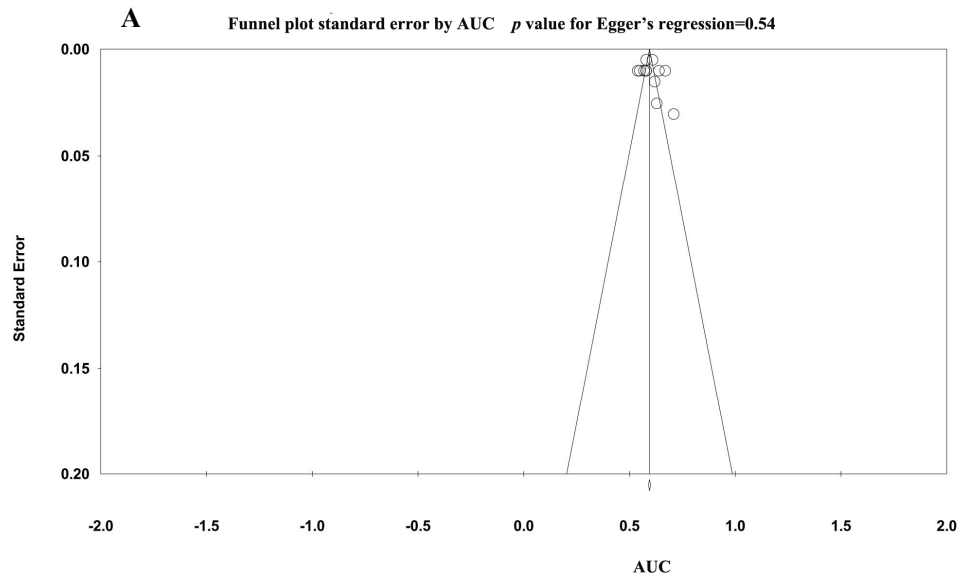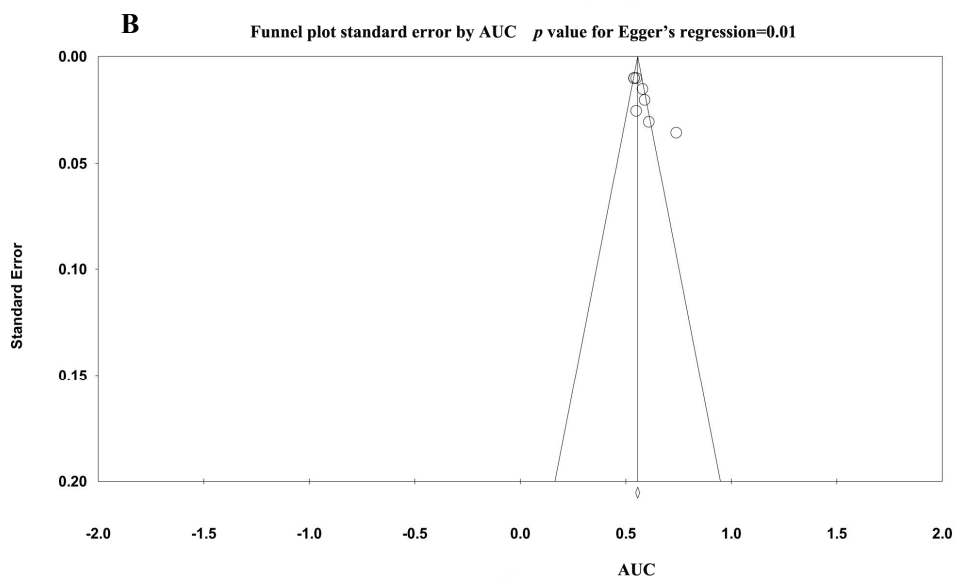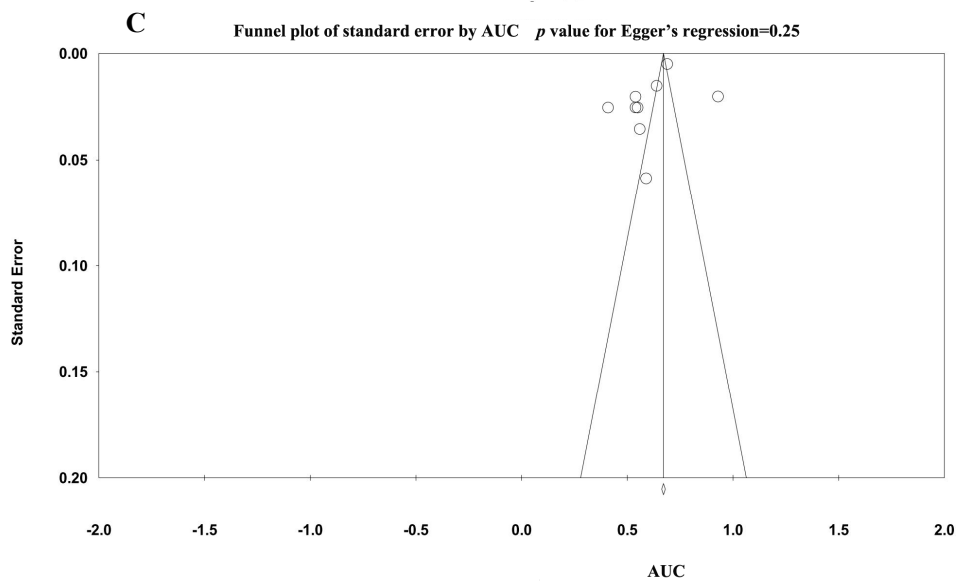

**Additional file 12.** Funnel plot of the discrimination of the Gail model when stratified by geographic region in America (A), Europe and others (B) and Asia (C).
