# Supplementary material for: Assessment of performance of the Gail model for predicting breast cancer risk: a systematic review and meta-analysis with trial sequential analysis
Source: Springer Nature journal article supplement (doi:10.1186/s13058-018-0947-5), 2018-03-13
Supplement: 13058_2018_947_MOESM18_ESM.pdf [file 13058_2018_947_MOESM18_ESM.pdf]

A

## Meta Analysis

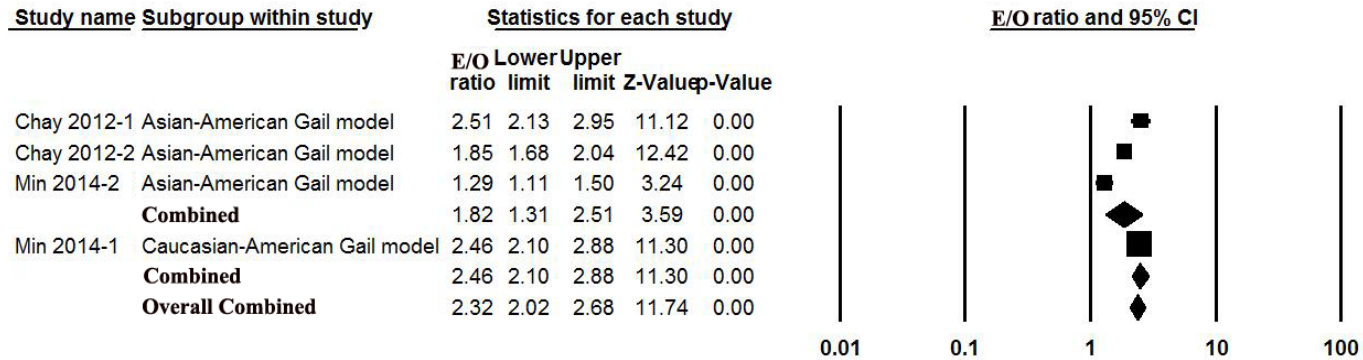

Meta Analysis

B

## Meta Analysis

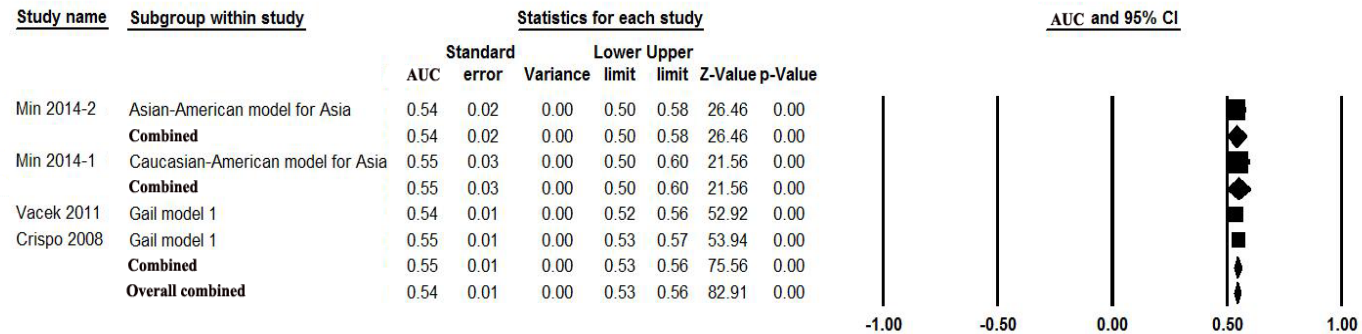

Meta Analysis

**Additional file 18.** The calibration (A) and discrimination (B) of different versions of the Gail model after excluding the studies published in Chinese.
