# Supplementary material for: Assessment of performance of the Gail model for predicting breast cancer risk: a systematic review and meta-analysis with trial sequential analysis
Source: Springer Nature journal article supplement (doi:10.1186/s13058-018-0947-5), 2018-03-13
Supplement: 13058_2018_947_MOESM19_ESM.pdf [file 13058_2018_947_MOESM19_ESM.pdf]

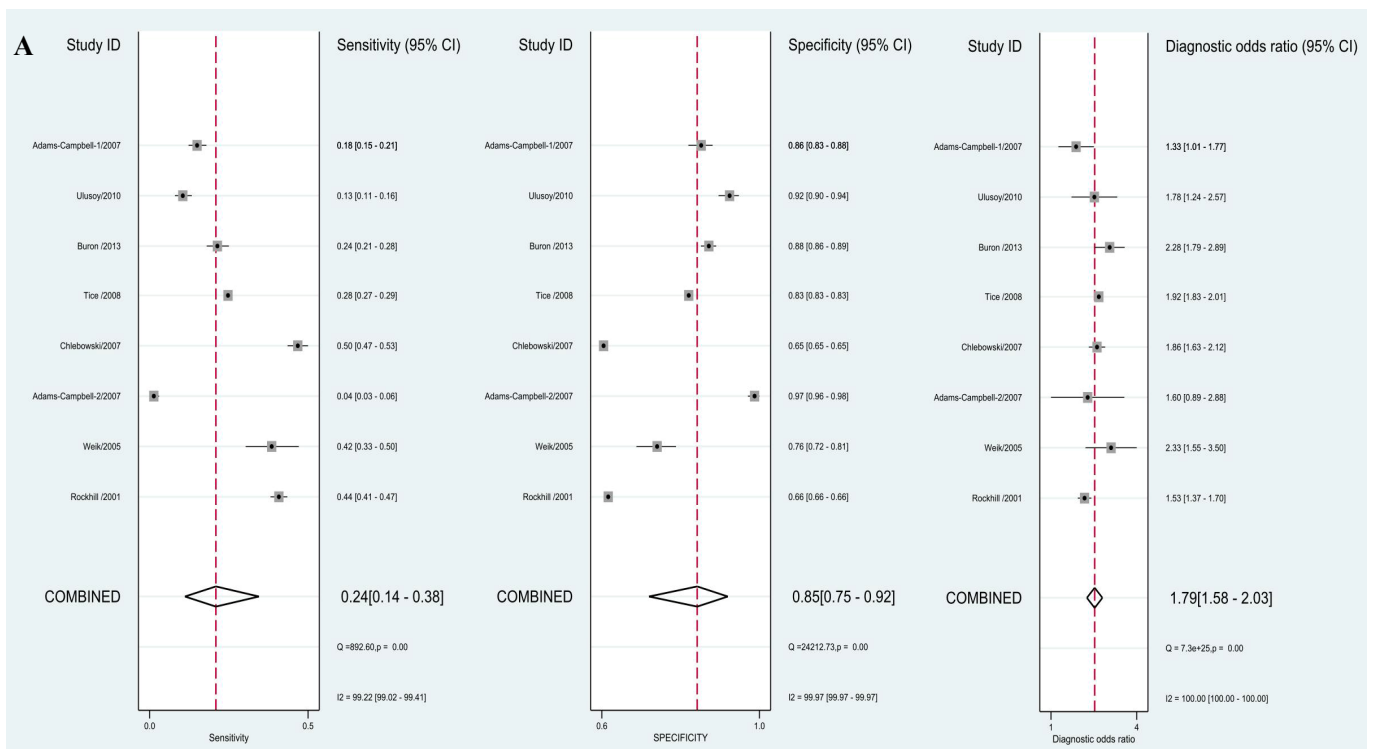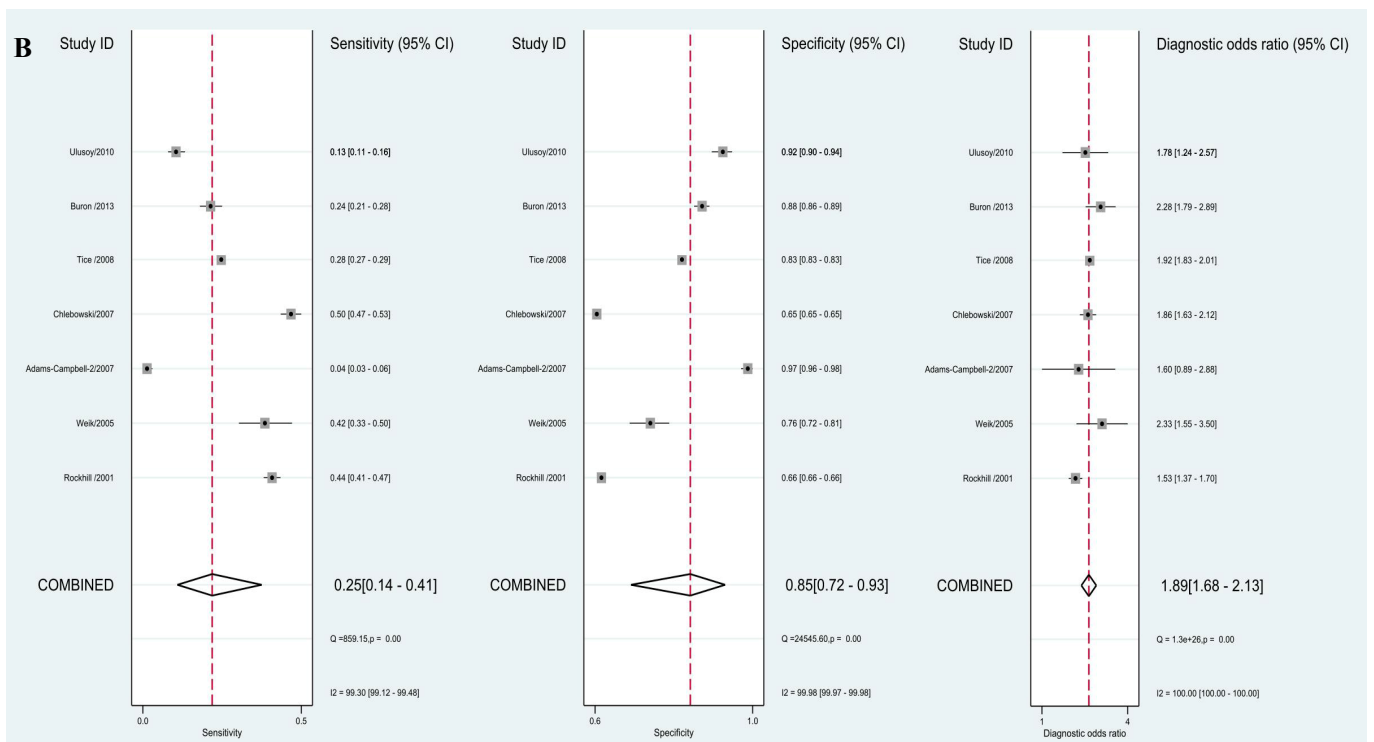

**Additional file 19.** The pooled sensitivity, specificity and diagnostic odds ratio of the Gail model 1 (A) and the Caucasian-American Gail model 2 (B) after excluding the studies published in Chinese.
