# Supplementary material for: Assessment of performance of the Gail model for predicting breast cancer risk: a systematic review and meta-analysis with trial sequential analysis
Source: Springer Nature journal article supplement (doi:10.1186/s13058-018-0947-5), 2018-03-13
Supplement: MOESM3 [file 15531510]

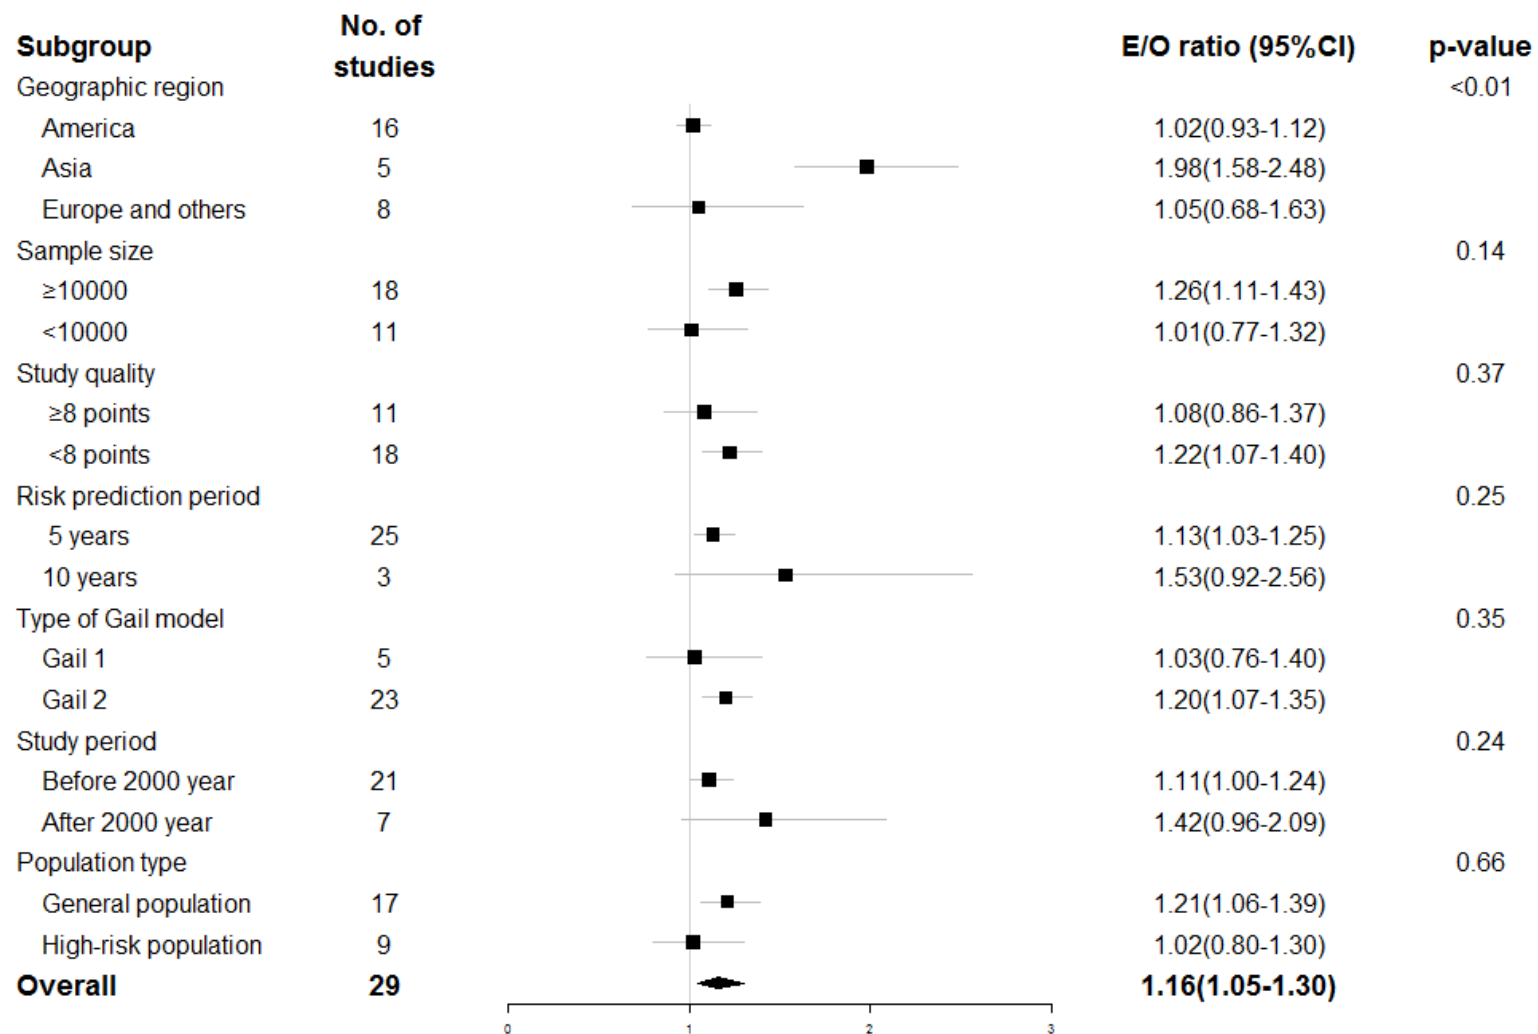

**Additional file 3.** Subgroup analysis of the calibration of the Gail model.
