# Supplementary material for: Assessment of performance of the Gail model for predicting breast cancer risk: a systematic review and meta-analysis with trial sequential analysis
Source: Springer Nature journal article supplement (doi:10.1186/s13058-018-0947-5), 2018-03-13
Supplement: MOESM15 [file 15531510]

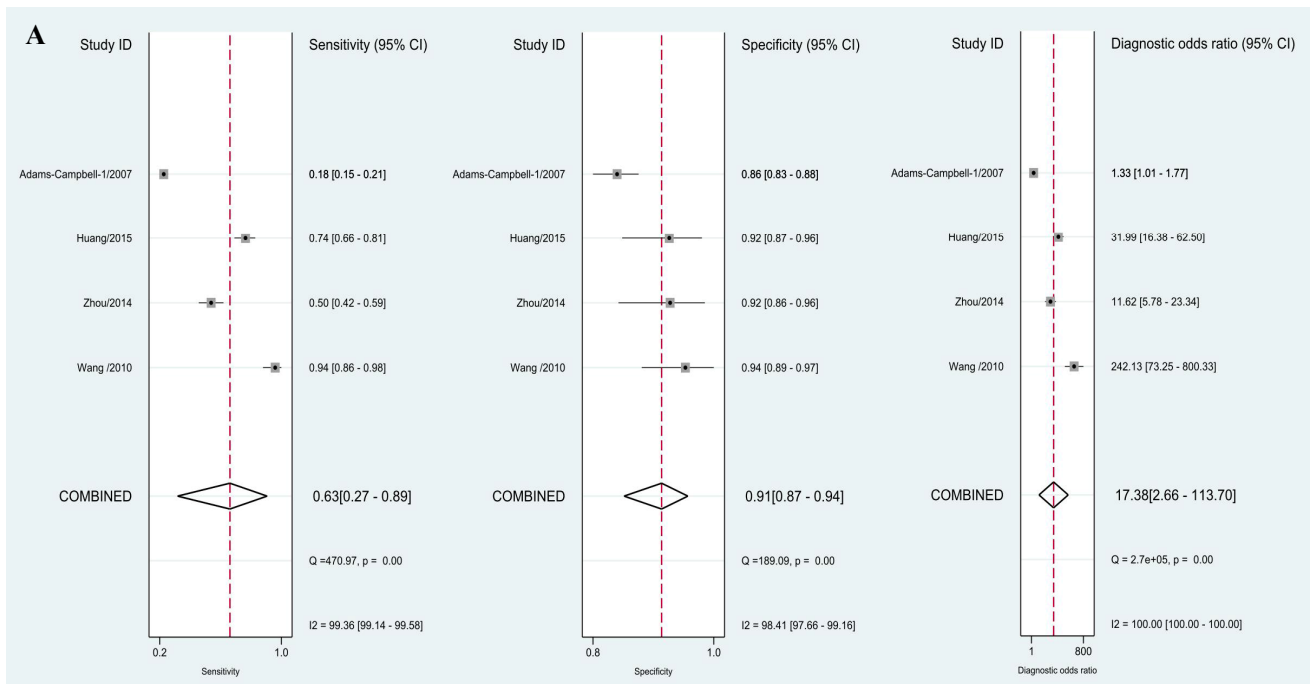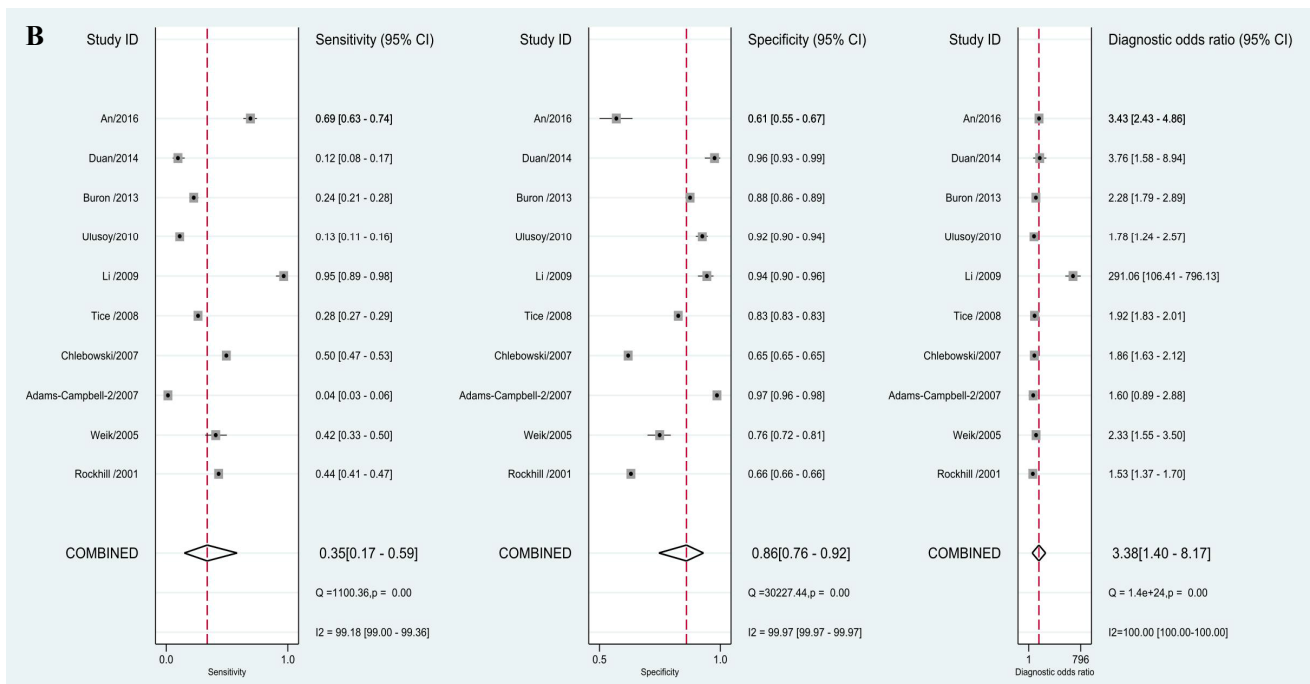

**Additional file 15.** The pooled sensitivity, specificity and diagnostic odds ratio of the Gail model 1 (A) and Gail model 2 (B).
